# Supplementary material for: Non-halogenated diphenyl-chalcogenide solvent processing additives for high-performance polymer bulk-heterojunction solar cells
Source: Royal Society of Chemistry journal article supplement (doi:10.1039/c8ra08317g), 2018-01-01
Supplement: c8ra08317g1.pdf [file c8ra08317g1.pdf]

Supporting Information for:

Non-Halogenated Diphenyl-Chalcogenide Solvent  
Processing Additives for High-Performance Polymer  
Bulk-Heterojunction Solar Cells

Song Yi Park<sup>a</sup>, Seyeong Song<sup>a</sup>, Yung Jin Yoon<sup>a</sup>, Tack Ho Lee<sup>a</sup>, Na Gyeong An<sup>a</sup>, Bright  
Walker<sup>\*b</sup> and Jin Young Kim<sup>\*a</sup>

<sup>a</sup>Department of Energy Engineering, Ulsan National Institute of Science and Technology  
(UNIST), Ulsan 44919, South Korea

<sup>b</sup>Department of Chemistry, Kyung Hee University, Seoul 02447, South Korea

AUTHOR INFORMATION

**Corresponding Author**

\*E-mail: [walker@khu.ac.kr](mailto:walker@khu.ac.kr) (Prof. B. Walker)

\*E-mail: [jykim@unist.ac.kr](mailto:jykim@unist.ac.kr) (Prof. J. Y. Kim)

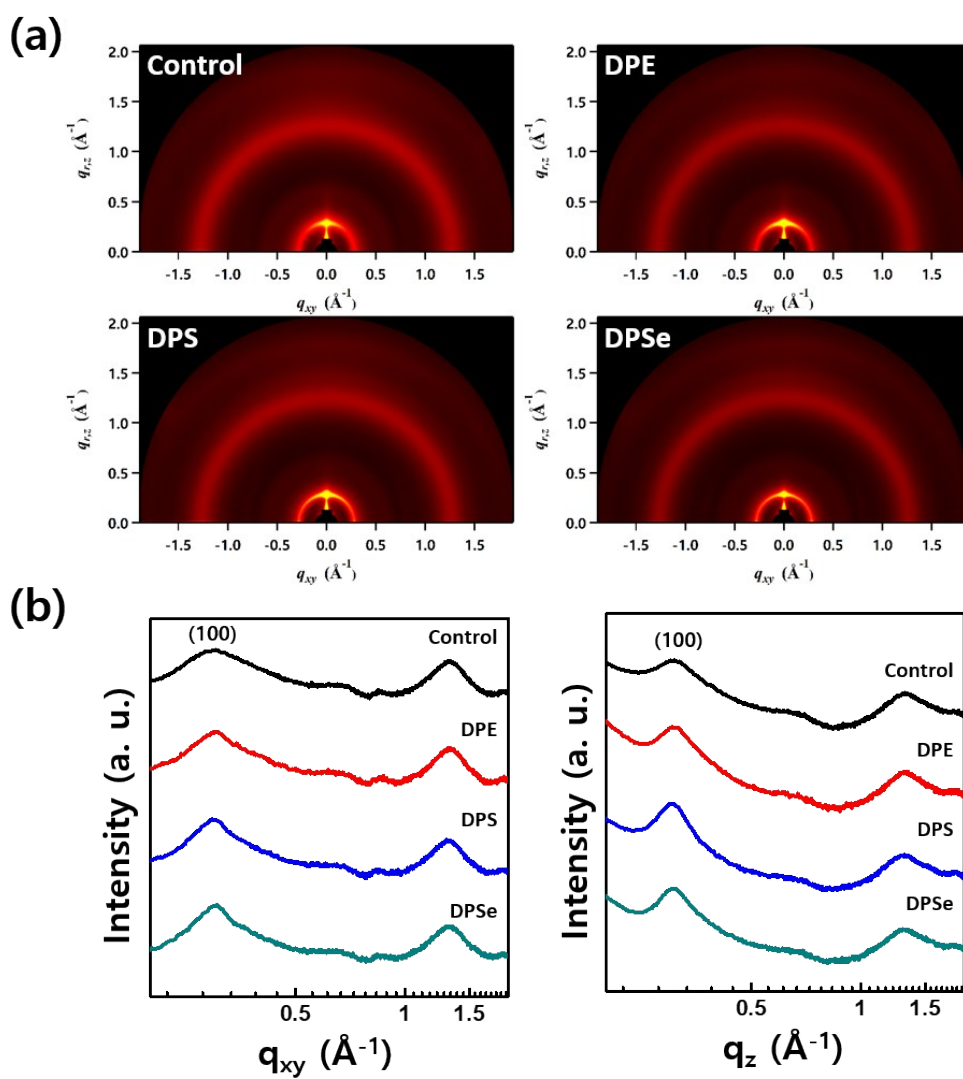

**Figure S1.** (a) 2D GIWAXS images and (b) line-cut profiles for PTB7-Th:PC<sub>71</sub>BM blend films processed with different solvent additives.

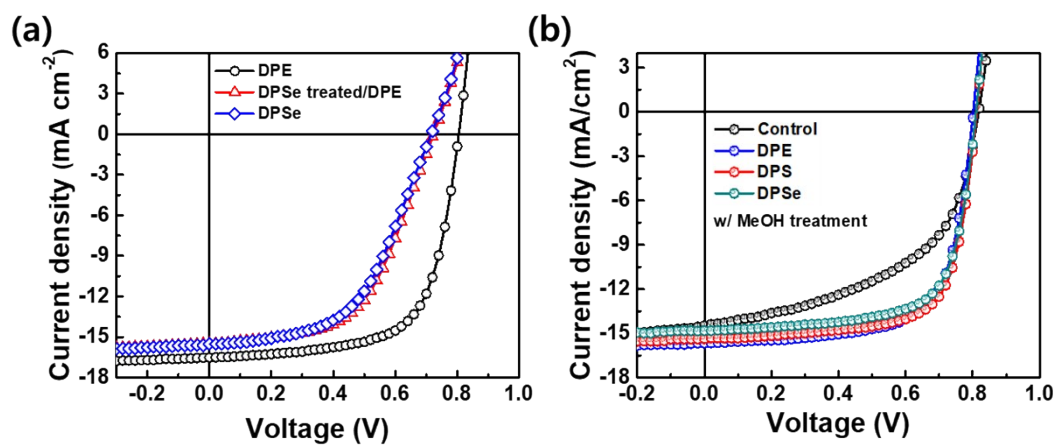

**Figure S2.**  $J$ - $V$  characteristics of PTB7-Th:PC<sub>71</sub>BM PSCs processed (a) under various conditions and (b) with methanol treatment.

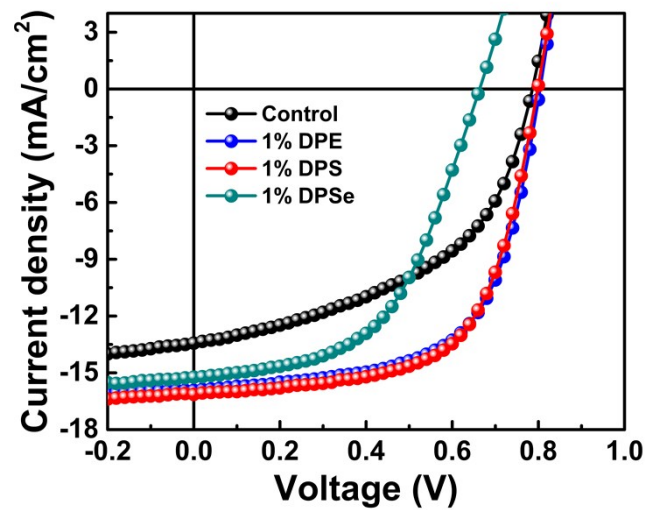

**Figure S3.** *J-V* characteristics of PTB7-Th:PC<sub>71</sub>BM PSCs with 1 vol% of DPX additives.

**Table S1.** Summary of photovoltaic parameters for PTB7-Th:PC<sub>71</sub>BM PSCs processed under various conditions.

| Device Structure                                | $J_{sc}$<br>[mA cm <sup>-2</sup> ] | $V_{oc}$<br>[V] | FF   | PCE<br>[%] |
|-------------------------------------------------|------------------------------------|-----------------|------|------------|
| PEDOT:PSS/Active Layer (3% DPE)                 | 16.0                               | 0.80            | 0.66 | 8.53       |
| PEDOT:PSS/3% DPSe treated/Active Layer (3% DPE) | 15.5                               | 0.72            | 0.55 | 6.16       |
| PEDOT:PSS/Active Layer (3% DPSe)                | 15.5                               | 0.72            | 0.53 | 5.87       |

**Table S2.** Summary of photovoltaic parameters for PTB7-Th:PC<sub>71</sub>BM PSCs processed with methanol treatment.

| Solvent additive<br>(3 vol%) | $J_{sc}$<br>[mA cm <sup>-2</sup> ] | $V_{oc}$<br>[V] | FF   | PCE<br>[%] |
|------------------------------|------------------------------------|-----------------|------|------------|
| Control                      | 14.5                               | 0.82            | 0.52 | 6.16       |
| DPE                          | 15.7                               | 0.80            | 0.67 | 8.74       |
| DPS                          | 15.4                               | 0.81            | 0.70 | 8.86       |
| DPSe                         | 14.8                               | 0.81            | 0.70 | 8.39       |

**Table S3.** Summary of photovoltaic parameters for PTB7-Th:PC<sub>71</sub>BM PSCs with 1 vol% of additives

| Solvent additive<br>(1 vol%) | $J_{sc}$<br>[mA cm <sup>-2</sup> ] | $V_{oc}$<br>[V] | FF   | PCE<br>[%] |
|------------------------------|------------------------------------|-----------------|------|------------|
| Control                      | 13.4                               | 0.79            | 0.49 | 5.15       |
| DPE                          | 15.9                               | 0.80            | 0.62 | 7.99       |
| DPS                          | 16.0                               | 0.80            | 0.63 | 8.10       |
| DPS <sub>e</sub>             | 15.2                               | 0.66            | 0.53 | 5.31       |

**Table S4.** Shunt and series resistances of PTB7-Th:PC<sub>71</sub>BM PSCs calculated from dark *J-V* curve

| Solvent additive<br>(3 vol%) | $R_{sh}$<br>[M $\Omega$ cm <sup>2</sup> ] | $R_s$<br>[ $\Omega$ cm <sup>2</sup> ] |
|------------------------------|-------------------------------------------|---------------------------------------|
| Control                      | 0.54                                      | 7.25                                  |
| DPE                          | 10.7                                      | 5.92                                  |
| DPS                          | 2.87                                      | 4.27                                  |
| DPS <sub>e</sub>             | 16.9                                      | 13.5                                  |
